# Supplementary material for: Effects of temperature and host stage on the parasitization rate and offspring sex ratio of Aenasius bambawalei Hayat in Phenacoccus solenopsis Tinsley
Source: PeerJ. 2016 Jan 14;4:e1586. doi: 10.7717/peerj.1586 (PMC4715446; doi:10.7717/peerj.1586)
Supplement: Supplemental Information 1 [file peerj-04-1586-s001.xls]

## Sheet: parasitization rate
parasitization rate
4h
		Female adult	Third instar nymph				SD	Female adult	Third instar nymph
	21	0	4.002					0	1.63
	24	2	0					2	0
	27	0	0					0	0
	30	10	5.336					0	1.33
	33	10	6.67					0	0
	36	12	13.33					2	0
	39	0	2.666					0	2.67
8h
		Female adult	Third instar nymph
	21	0	5.336				SD	Female adult	Third instar nymph
	24	4	2.668					0	1.63
	27	10	10.666					2.45	1.63
	30	36	16.002					0	1.63
	33	10	10.666					11.66	7.77
	36	16	15.998					0	1.63
	39	2	4					2.45	1.63
								2	2.67
12h
		Female adult	Third instar nymph
	21 °C	0	4.002				SD	Female adult	Third instar nymph
	24 °C	4	4.002					0	1.63
	27 °C	10	11.998					2.45	1.63
	30 °C	38	13.33					0	1.33
	33 °C	26	14.664					6.63	0
	36 °C	18	17.332					2.45	1.33
	39 °C	10	4					3.74	1.63
								0	2.67
16h
		Female adult	Third instar nymph
	21 °C	10	4.002				SD	Female adult	Third instar nymph
	24 °C	6	9.334					5.48	1.63
	27 °C	34	13.33					2.45	1.63
	30 °C	32	18.666					4	0
	33 °C	24	20					2	1.33
	36 °C	26	21.334					5.1	0
	39 °C	6	2.668					2.45	1.33
								4	1.63
24h
		Female adult	Third instar nymph
	21 °C	4	5.336				SD	Female adult	Third instar nymph
	24 °C	8	10.666					2.45	1.63
	27 °C	28	15.998					3.74	1.63
	30 °C	42	20					2	1.63
	33 °C	42	24.002					2	0
	36 °C	52	26.67					3.74	1.63
	39 °C	4	2.668					8	0
								2.45	1.63
